## The whole diagram of the discovered host immunological pathways

By Wanchung Hu

Department of Neurology

Shin-Kong Wu Ho Su Memorial Hospital

### Abstract

The host immunological pathways are re-organized to get a clear picture. There are four acute immune responses: TH1/TH2/TH22/TH $\alpha\beta$  which are corresponding to four chronic immune responses: THfh/TH9/TH17/TH3. Then, the four branches of immune reactions can link to four types of hypersensitivities or allergies. Another inhibitory pathway Treg secreting TGF beta is the key player to shift the above acute immune responses to chronic immune responses for generating milder cytokines and other immune mediators to avoid severe destruction of organ during chronic and large scale of pathogen infection of tissue-organ. This 4x2+1 is the new diagram of host immunological pathways.

### Review

There are many discovered host immunological pathways including traditional TH1/TH2, TH3, TH17, TH22, THfh, Treg, TH9, and Tr1(TH $\alpha\beta$ ). These identified pathways are not logically organized. Here, I will propose a detailed picture about the whole context of host immunological pathways.

The traditional TH1/TH2 paradigm was proposed by Dr. Mosmann in 1986. TH1 was thought the host immunity against viruses and intracellular bacteria. TH2 is the host immunity against multicellular parasites (helminthes). In my PhD thesis, I proposed a new TH $\alpha\beta$  immunological pathway against viruses that is divided from traditional TH1 immunity. The TH1 immunity is then focusing on intracellular bacteria and protozoa.

TH1 immunity is driven by IL-12. The main effector cells of TH1 immunity are macrophages, CTLs, IFN $\gamma$  secreting CD4 T cells, and IgG3 producing B cells. The key transcription factors for TH1 immunity is STAT4 and STAT1. T-bet also plays a vital role in TH1 immunological pathway. TH1 immunity against self antigen is Type 4 Delayed

type hypersensitivity such as tuberculin BCG reaction.

TH2 immunity is driven by IL-4. The main effector cells of TH2 immunity are eosinophils, basophils, mast cells, IL-4/IL-5 secreting CD4 T cells, and IgG4/IgE producing B cells. The key transcription factor for TH2 immunity is STAT6. GATA3 also plays a vital role in TH2 immunological pathway. TH2 immunity against self antigen is Type1 IgE mediated allergy and hypersensitivity such as food allergy or urticaria.

TH $\alpha$  $\beta$  is distinguished from the traditional TH1 immunity. It was called Tr1 cell by some previous researchers. TH $\alpha$  $\beta$  immunity is driven by IFN $\alpha$ /b or IL-10. The main effector cells of TH $\alpha$  $\beta$  immunity are NK cells, IL-10/IL-27 secreting CD4 T cells, CTLs, and IgG1 producing B cells. The key transcription factor for TH $\alpha$  $\beta$  immunity is STAT1, STAT2, and STAT3. TH $\alpha$  $\beta$  immunity against self antigen is Type 3 Antibody dependent cellular cytotoxic hypersensitivity such as Myasthenia Gravis.

TH22 is the host innate immunity against extracellular bacteria and fungi[1, 2]. TH22 is driven by IL-6 or TNF $\alpha$ [3, 4]. The main effector cells for TH22 immunity are PMNs, IL-22 secreting CD4 T cells, complements, pentraxins, and IgM/IgG2 producing B cells.[5, 6] The key transcription factor for TH22 is STAT3[7]. AP1 and CEBP are also important. TH22 against self antigen is Type 2 immune-complex and complement mediated hypersensitivity such as Arthus reaction.

Treg is the host immune inhibitory mechanism. It is driven by IL-2 and TGF beta. The main effector cells for Treg are TGF $\beta$  producing CD4 T cell and IgA producing B cell. The key transcription factor for Treg pathway is STAT5. The combination of Treg and the above four immunological pathways is important to shift acute immunity to chronic immunity. During the initial infection, acute fierce cytokines can rapidly kill pathogens as well as infected cells or tissues. However, if the pathogen infects a lot of cells in a tissue such as liver, to kill the infected cells will total destroyed the organ. Thus, regulatory T cells combining TH1/TH2/TH22/TH $\alpha$  $\beta$  will make CD4 T cells with less fierce cytokines. Then, THfh/TH9/TH17/TH3 immunological pathways will be generated.

Follicular helper T cells (THfh) is thought to be the key helper cells for the B cell germinal centers. However, several key papers pointed out that it has a close relation to TH1 helper cells and THfh cells are called TH1-like cells.[8] TH1-like cells with Foxp3+ regulatory character are identified.[9, 10] IL-12 and IFN $\gamma$  can cause overproduction of THfh helper T cells.[11-13]IL-12 can drive the early commitment

for THfh lineage and is vital to THfh development.[14-17] THfh cells are characterized by IL-21 producing T cells[18, 19]. TGF beta is found to differentiate the IL-21 producing helper T cells[20]. IL-21 production is also related to STAT4 and STAT1 activation.[21-23] But, BCL6 is key in THfh development.[24-26] In addition, STAT3(TH22) and IFN $\alpha$ /b(TH $\alpha$  $\beta$ ) suppress the development of THfh cells[27]. And, BCL6 can suppress key TH2 transcription factor GATA3.[28] THfh or TH1-like cells are important in chronic intracellular bacterial infection or in chronic DTH autoimmune diseases[29-31]. Thus, THfh or TH1-like helper T cells is the chronic T helper cells related to TH1 immunity.[32]

TH9 cell is driven by IL-4 combining TGF beta.[33] Thus, TH9 cell is closely related to TH2 immunological pathway. It is characterized by IL-9 secreting CD4 T cell. TH9 cells are found to be important in chronic allergic condition such as asthma. Thus, TH9 helper cell is the chronic T helper cells related to TH2 immunity.

TH17 cell is driven by IL-6 / IL-1 combining TGF beta[34]. Thus, TH17 cell is closely related to TH22 immunological pathway. It is characterized by IL-17 secreting CD4 T cell. TH17 cells are found to be important in chronic immune-complex mediated disease such as rheumatic arthritis. Then, TH17 helper cell is the chronic T helper cell related to TH22 immunity. [35] TGF beta can suppress the acute IL-22 producing cells and enhance the chronic IL-17 producing cells[36]. Because of the role of TGF beta in TH17 immunity, regulatory IL-17 producing cells are noted.[37, 38]

TH3 cells are driven by IL-10 and TGF beta.[39] Thus, TH3 cells are closely related to TH $\alpha$  $\beta$  immunological pathway. It also produces IL-10 as well as TGF beta. Thus, TH3 helper cell is important to chronic antibody dependent cellular cytotoxic hypersensitivity. TH3 cell is the chronic helper T cells corresponding to TH $\alpha$  $\beta$  helper cell.

Thus, this eight diagram: 4x2+1 immunological pathways are the whole pictures of host immunological pathways. Then, we can clearly understand the detailed immune response against acute or chronic pathogens as well as acute or chronic allergy/hypersensitivity.

## References

- [1] S. J. Aujla, Y. R. Chan, M. Zheng, M. Fei, D. J. Askew, D. A. Pociask, *et al.*, "IL-22 mediates mucosal host defense against Gram-negative bacterial pneumonia," *Nat Med*, vol. 14, pp. 275-81, Mar 2008.
- [2] K. Wolk, S. Kunz, E. Witte, M. Friedrich, K. Asadullah, and R. Sabat, "IL-22 increases the innate immunity of tissues," *Immunity*, vol. 21, pp. 241-54, Aug 2004.
- [3] K. Ghoreschi, A. Laurence, X. P. Yang, C. M. Tato, M. J. McGeachy, J. E. Konkel, *et al.*, "Generation of pathogenic T(H)17 cells in the absence of TGF-beta signalling," *Nature*, vol. 467, pp. 967-71, Oct 21 2010.
- [4] S. Trifari, C. D. Kaplan, E. H. Tran, N. K. Crellin, and H. Spits, "Identification of a human helper T cell population that has abundant production of interleukin 22 and is distinct from T(H)-17, T(H)1 and T(H)2 cells," *Nat Immunol*, vol. 10, pp. 864-71, Aug 2009.
- [5] T. Duhon, R. Geiger, D. Jarrossay, A. Lanzavecchia, and F. Sallusto, "Production of interleukin 22 but not interleukin 17 by a subset of human skin-homing memory T cells," *Nat Immunol*, vol. 10, pp. 857-63, Aug 2009.
- [6] S. Eyerich, K. Eyerich, D. Pennino, T. Carbone, F. Nasorri, S. Pallotta, *et al.*, "Th22 cells represent a distinct human T cell subset involved in epidermal immunity and remodeling," *J Clin Invest*, vol. 119, pp. 3573-85, Dec 2009.
- [7] Y. Yoshida, A. Kumar, Y. Koyama, H. Peng, A. Arman, J. A. Boch, *et al.*, "Interleukin 1 activates STAT3/nuclear factor-kappaB cross-talk via a unique TRAF6- and p65-dependent mechanism," *J Biol Chem*, vol. 279, pp. 1768-76, Jan 16 2004.
- [8] K. J. Oestreich, S. E. Mohn, and A. S. Weinmann, "Molecular mechanisms that control the expression and activity of Bcl-6 in TH1 cells to regulate flexibility with a TFH-like gene profile," *Nat Immunol*, vol. 13, pp. 405-11, Apr 2012.
- [9] M. Dominguez-Villar, C. M. Baecher-Allan, and D. A. Hafler, "Identification of T helper type 1-like, Foxp3+ regulatory T cells in human autoimmune disease," *Nat Med*, vol. 17, pp. 673-5, Jun 2011.
- [10] R. A. O'Connor, M. D. Leech, J. Suffner, G. J. Hammerling, and S. M. Anderton, "Myelin-reactive, TGF-beta-induced regulatory T cells can be programmed to develop Th1-like effector function but remain less proinflammatory than myelin-reactive Th1 effectors and can suppress pathogenic T cell clonal expansion in vivo," *J Immunol*, vol. 185, pp. 7235-43, Dec 15 2010.
- [11] T. Feng, A. T. Cao, C. T. Weaver, C. O. Elson, and Y. Cong, "Interleukin-12 converts Foxp3+ regulatory T cells to interferon-gamma-producing Foxp3+ T cells that inhibit colitis," *Gastroenterology*, vol. 140, pp. 2031-43, Jun 2011.

- [12] S. K. Lee, D. G. Silva, J. L. Martin, A. Pratama, X. Hu, P. P. Chang, *et al.*, "Interferon-gamma excess leads to pathogenic accumulation of follicular helper T cells and germinal centers," *Immunity*, vol. 37, pp. 880-92, Nov 16 2012.
- [13] J. Zheng, Y. Liu, G. Qin, K. T. Lam, J. Guan, Z. Xiang, *et al.*, "Generation of human Th1-like regulatory CD4+ T cells by an intrinsic IFN-gamma- and T-bet-dependent pathway," *Eur J Immunol*, vol. 41, pp. 128-39, Jan 2011.
- [14] C. S. Ma, S. Suryani, D. T. Avery, A. Chan, R. Nanan, B. Santner-Nanan, *et al.*, "Early commitment of naive human CD4(+) T cells to the T follicular helper (T(FH)) cell lineage is induced by IL-12," *Immunol Cell Biol*, vol. 87, pp. 590-600, Nov-Dec 2009.
- [15] J. Prochazkova, K. Pokorna, and V. Holan, "IL-12 inhibits the TGF-beta-dependent T cell developmental programs and skews the TGF-beta-induced differentiation into a Th1-like direction," *Immunobiology*, vol. 217, pp. 74-82, Jan 2012.
- [16] N. Schmitt, J. Bustamante, L. Bourdery, S. E. Bentebibel, S. Boisson-Dupuis, F. Hamlin, *et al.*, "IL-12 receptor beta1 deficiency alters in vivo T follicular helper cell response in humans," *Blood*, vol. 121, pp. 3375-85, Apr 25 2013.
- [17] N. Schmitt, R. Morita, L. Bourdery, S. E. Bentebibel, S. M. Zurawski, J. Banchereau, *et al.*, "Human dendritic cells induce the differentiation of interleukin-21-producing T follicular helper-like cells through interleukin-12," *Immunity*, vol. 31, pp. 158-69, Jul 17 2009.
- [18] D. Fina, M. Sarra, R. Caruso, G. Del Vecchio Blanco, F. Pallone, T. T. MacDonald, *et al.*, "Interleukin 21 contributes to the mucosal T helper cell type 1 response in coeliac disease," *Gut*, vol. 57, pp. 887-92, Jul 2008.
- [19] K. Luthje, A. Kallies, Y. Shimohakamada, G. T. Belz, A. Light, D. M. Tarlinton, *et al.*, "The development and fate of follicular helper T cells defined by an IL-21 reporter mouse," *Nat Immunol*, vol. 13, pp. 491-8, May 2012.
- [20] Y. Liu, S. Yu, Z. Li, J. Ma, Y. Zhang, H. Wang, *et al.*, "TGF-beta enhanced IL-21-induced differentiation of human IL-21-producing CD4+ T cells via Smad3," *PLoS One*, vol. 8, p. e64612, 2013.
- [21] A. Agrawal, H. Su, J. Chen, K. Osann, S. Agrawal, and S. Gupta, "Increased IL-21 secretion by aged CD4+T cells is associated with prolonged STAT-4 activation and CMV seropositivity," *Ageing (Albany NY)*, vol. 4, pp. 648-59, Sep 2012.
- [22] Y. S. Choi, D. Eto, J. A. Yang, C. Lao, and S. Crotty, "Cutting edge: STAT1 is required for IL-6-mediated Bcl6 induction for early follicular helper cell differentiation," *J Immunol*, vol. 190, pp. 3049-53, Apr 1 2013.

- [23] M. Strengell, T. Sareneva, D. Foster, I. Julkunen, and S. Matikainen, "IL-21 up-regulates the expression of genes associated with innate immunity and Th1 response," *J Immunol*, vol. 169, pp. 3600-5, Oct 1 2002.
- [24] D. Baumjohann, T. Okada, and K. M. Ansel, "Cutting Edge: Distinct waves of BCL6 expression during T follicular helper cell development," *J Immunol*, vol. 187, pp. 2089-92, Sep 1 2011.
- [25] M. A. Linterman, L. Beaton, D. Yu, R. R. Ramiscal, M. Srivastava, J. J. Hogan, *et al.*, "IL-21 acts directly on B cells to regulate Bcl-6 expression and germinal center responses," *J Exp Med*, vol. 207, pp. 353-63, Feb 15 2010.
- [26] R. I. Nurieva, Y. Chung, G. J. Martinez, X. O. Yang, S. Tanaka, T. D. Matskevitch, *et al.*, "Bcl6 mediates the development of T follicular helper cells," *Science*, vol. 325, pp. 1001-5, Aug 21 2009.
- [27] J. P. Ray, H. D. Marshall, B. J. Laidlaw, M. M. Staron, S. M. Kaech, and J. Craft, "Transcription factor STAT3 and type I interferons are corepressive insulators for differentiation of follicular helper and T helper 1 cells," *Immunity*, vol. 40, pp. 367-77, Mar 20 2014.
- [28] D. V. Sawant, S. Sehra, E. T. Nguyen, R. Jadhav, K. Englert, R. Shinnakasu, *et al.*, "Bcl6 controls the Th2 inflammatory activity of regulatory T cells by repressing Gata3 function," *J Immunol*, vol. 189, pp. 4759-69, Nov 15 2012.
- [29] H. J. Ko, H. Yang, J. Y. Yang, S. U. Seo, S. Y. Chang, J. K. Seong, *et al.*, "Expansion of Tfh-like cells during chronic Salmonella exposure mediates the generation of autoimmune hypergammaglobulinemia in MyD88-deficient mice," *Eur J Immunol*, vol. 42, pp. 618-28, Mar 2012.
- [30] G. Monteleone, I. Monteleone, D. Fina, P. Vavassori, G. Del Vecchio Blanco, R. Caruso, *et al.*, "Interleukin-21 enhances T-helper cell type I signaling and interferon-gamma production in Crohn's disease," *Gastroenterology*, vol. 128, pp. 687-94, Mar 2005.
- [31] T. Ulrichs, G. A. Kosmiadi, V. Trusov, S. Jorg, L. Pradl, M. Titukhina, *et al.*, "Human tuberculous granulomas induce peripheral lymphoid follicle-like structures to orchestrate local host defence in the lung," *J Pathol*, vol. 204, pp. 217-28, Oct 2004.
- [32] M. Duan, Y. Huang, X. Zhong, and H. Tang, "IL-21 is increased in peripheral blood of emphysema mice and promotes Th1/Tc1 cell generation in vitro," *Inflammation*, vol. 37, pp. 745-55, Jun 2014.
- [33] V. Dardalhon, A. Awasthi, H. Kwon, G. Galileos, W. Gao, R. A. Sobel, *et al.*, "IL-4 inhibits TGF-beta-induced Foxp3+ T cells and, together with TGF-beta, generates IL-9+ IL-10+ Foxp3(-) effector T cells," *Nat Immunol*, vol. 9, pp. 1347-55, Dec 2008.

- [34] Y. Chung, S. H. Chang, G. J. Martinez, X. O. Yang, R. Nurieva, H. S. Kang, *et al.*, "Critical regulation of early Th17 cell differentiation by interleukin-1 signaling," *Immunity*, vol. 30, pp. 576-87, Apr 17 2009.
- [35] S. C. Liang, X. Y. Tan, D. P. Luxenberg, R. Karim, K. Dunussi-Joannopoulos, M. Collins, *et al.*, "Interleukin (IL)-22 and IL-17 are coexpressed by Th17 cells and cooperatively enhance expression of antimicrobial peptides," *J Exp Med*, vol. 203, pp. 2271-9, Oct 2 2006.
- [36] S. Rutz, R. Noubade, C. Eidenschenk, N. Ota, W. Zeng, Y. Zheng, *et al.*, "Transcription factor c-Maf mediates the TGF-beta-dependent suppression of IL-22 production in T(H)17 cells," *Nat Immunol*, vol. 12, pp. 1238-45, Dec 2011.
- [37] G. Beriou, C. M. Costantino, C. W. Ashley, L. Yang, V. K. Kuchroo, C. Baecher-Allan, *et al.*, "IL-17-producing human peripheral regulatory T cells retain suppressive function," *Blood*, vol. 113, pp. 4240-9, Apr 30 2009.
- [38] K. S. Voo, Y. H. Wang, F. R. Santori, C. Boggiano, Y. H. Wang, K. Arima, *et al.*, "Identification of IL-17-producing FOXP3+ regulatory T cells in humans," *Proc Natl Acad Sci U S A*, vol. 106, pp. 4793-8, Mar 24 2009.
- [39] Z. M. Chen, M. J. O'Shaughnessy, I. Gramaglia, A. Panoskaltsis-Mortari, W. J. Murphy, S. Narula, *et al.*, "IL-10 and TGF-beta induce alloreactive CD4+CD25- T cells to acquire regulatory cell function," *Blood*, vol. 101, pp. 5076-83, Jun 15 2003.
